# Supplementary material for: Large library docking for cannabinoid-1 receptor agonists with reduced side effects
Source: PubMed Central journal article supplement (PMC10849508; doi:10.1101/2023.02.27.530254), 2024-01-23
Supplement: media-1.pdf [file media-1.pdf]

# Supplementary Information for

## Large library docking for cannabinoid-1 receptor agonists with reduced side effects

Tia A. Tummino<sup>1,2,†</sup>, Christos Iliopoulos-Tsoutsouvas<sup>3,†</sup>, Joao M. Braz<sup>4,†</sup>, Evan S. O'Brien<sup>5</sup>, Reed M. Stein<sup>1,2</sup>, Veronica Craik<sup>4</sup>, Ngan K. Tran<sup>3</sup>, Suthakar Ganapathy<sup>3</sup>, Fangyu Liu<sup>1</sup>, Yuki Shiimura<sup>5,6</sup>, Fei Tong<sup>3</sup>, Thanh C. Ho<sup>3</sup>, Dmytro S. Radchenko<sup>7</sup>, Yurii S. Moroz<sup>7,8,9</sup>, Sian Rodriguez Rosado<sup>4</sup>, Karnika Bhardwaj<sup>4</sup>, Jorge Benitez<sup>4</sup>, Yongfeng Liu<sup>10</sup>, Herthana Kandasamy<sup>11</sup>, Claire Normand<sup>11</sup>, Meriem Semache<sup>11</sup>, Laurent Sabbagh<sup>11</sup>, Isabella Glenn<sup>1</sup>, John J. Irwin<sup>1</sup>, Kaavya Krishna Kumar<sup>5,\*</sup>, Alexandros Makriyannis<sup>3,12\*</sup>, Allan I. Basbaum<sup>4,\*</sup>, & Brian K. Shoichet<sup>1,\*,#</sup>

†Contributed equally.

#Lead Contact

\*Correspondence: [kaavyak@stanford.edu](mailto:kaavyak@stanford.edu), [a.makriyannis@northeastern.edu](mailto:a.makriyannis@northeastern.edu), [allan.basbaum@ucsf.edu](mailto:allan.basbaum@ucsf.edu), [bshoichet@gmail.com](mailto:bshoichet@gmail.com)

This file includes:

Supplementary Tables 1 to 8

Additional supplementary materials:

Synthetic procedures, chemical characterization and spectral data is supplied as

Supplemental\_Information\_QC.pdf

Supplementary\_Table\_9.xlsx

Model\_final.pdb

Map\_final.mrc

PDB\_Validation\_report.pdf

**Supplementary Table 1. Binding affinities for hits identified in initial CB1 docking screen.**

| Compound                                                                                     | Global rank | rCB1 affinity <sup>a</sup><br>K <sub>i</sub> [95% CI] nM<br>pK <sub>i</sub> [95% CI] | Tc <sup>b</sup> | Nearest ChEMBL ligand <sup>c</sup>                                                                     |
|----------------------------------------------------------------------------------------------|-------------|--------------------------------------------------------------------------------------|-----------------|--------------------------------------------------------------------------------------------------------|
| 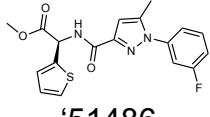<br>'51486  | 117390      | 731 [552 – 969]<br>6.14 [6.01 – 6.26]                                                | 0.30            | <br>CHEMBL4110127   |
| <br>'0450   | 6582        | 691 [459 – 1033]<br>6.16 [5.99 – 6.34]                                               | 0.36            | <br>CHEMBL519214    |
| <br>'7800   | 12210       | 1007 [615 – 1654]<br>6.0 [5.78 – 6.21]                                               | 0.28            | <br>CHEMBL3116279   |
| <br>'7019   | 20488       | 4039 [3027 – 5379]<br>5.39 [5.27 – 5.52]                                             | 0.24            | <br>CHEMBL472680    |
| <br>'7218 | 29322       | 52.2% [24.79]                                                                        | 0.31            | <br>CHEMBL3347301  |
| <br>'1038 | 47606       | 53.6% [2.91]                                                                         | 0.28            | <br>CHEMBL3890211 |
| <br>'7337 | 24720       | 57.0% [3.04]                                                                         | 0.29            | <br>CHEMBL259699  |
| <br>'7902 | 139929      | 57.1% [0.02]                                                                         | 0.31            | <br>CHEMBL3915046 |

|                                                                                                |       |              |      |                                                                                                          |
|------------------------------------------------------------------------------------------------|-------|--------------|------|----------------------------------------------------------------------------------------------------------|
| 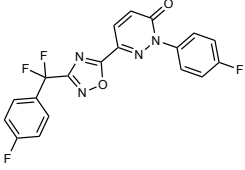 <p>'2443</p> | 21964 | 51.1% [4.87] | 0.23 |  <p>CHEMBL3354970</p> |
|------------------------------------------------------------------------------------------------|-------|--------------|------|----------------------------------------------------------------------------------------------------------|

<sup>a</sup>Binding affinity to rCB1 represented as  $K_i$  [95% CI] and  $pK_i$  [95% CI] from three independent experiments in triplicate when measured. Otherwise, % radioligand displacement [S.D] from three replicates in a single-point competition experiment at 10  $\mu\text{M}$

<sup>b</sup>Tanimoto coefficient based on ECFP4 fingerprints

<sup>c</sup>Corresponding ChEMBL ligand with the most similar fingerprint

**Supplementary Table 2. Binding affinities and functional activities for active analogs at CB1.**

| Compound                                                                                              | rCB1 binding<br>K <sub>i</sub> [95% CI] (nM)<br>pK <sub>i</sub> [95% CI]<br>E <sub>max</sub> [SEM]<br>Significance <sup>a</sup> | hCB1 Lance Ultra cAMP<br>EC <sub>50</sub> [95% CI] (nM)<br>pEC <sub>50</sub> [95% CI]<br>E <sub>max</sub> [95% CI]<br>Significance <sup>a</sup> | hCB1 Cerep cAMP<br>EC <sub>50</sub> [95% CI] (nM)<br>pEC <sub>50</sub> [95% CI]<br>E <sub>max</sub> [95% CI] | hCB1 Glosensor cAMP<br>EC <sub>50</sub> [95% CI] (nM)<br>pEC <sub>50</sub> [95% CI]<br>E <sub>max</sub> [95% CI] | hCB1 Tango β-arrestin recruitment<br>EC <sub>50</sub> [95% CI] (nM)<br>pEC <sub>50</sub> [95% CI]<br>E <sub>max</sub> [95% CI] | hCB1 DiscoverX β-arrestin recruitment<br>EC <sub>50</sub> [95% CI] (nM)<br>pEC <sub>50</sub> [95% CI]<br>E <sub>max</sub> [95% CI] |
|-------------------------------------------------------------------------------------------------------|---------------------------------------------------------------------------------------------------------------------------------|-------------------------------------------------------------------------------------------------------------------------------------------------|--------------------------------------------------------------------------------------------------------------|------------------------------------------------------------------------------------------------------------------|--------------------------------------------------------------------------------------------------------------------------------|------------------------------------------------------------------------------------------------------------------------------------|
| 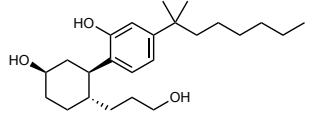<br><b>CP-55,940</b> | 2.9 [2.05 – 4.2]<br>8.5 [8.4 – 8.7]<br>98% [3.5]                                                                                | 6.2 [4.7 – 8.0]<br>8.2 [8.1 – 8.3]<br>85% [86 – 85]                                                                                             | 0.026                                                                                                        | 0.028 [0.02 – 0.04]<br>10.6 [10.5 – 10.7]<br>96% [93 – 99]                                                       | 8.9 [7.5 – 10.6]<br>8.1 [8.0 – 8.1]<br>100% [96 – 104]                                                                         | 4.0 [3.2 – 4.9]<br>8.4 [8.3 – 8.5]<br>108% [99 – 109]                                                                              |
| <br><b>'4042</b>     | 1.86 [1.37 – 2.52]<br>8.7 [8.6 – 8.9]<br>99% [3.0]<br>ns                                                                        | 3.3 [1.9 – 5.6]<br>8.5 [8.3 – 8.7]<br>78% [78 – 79]<br>ns                                                                                       | 0.008 [0.006 – 0.01]<br>11.1 [11.0 – 11.2]<br>96% [102 – 107]                                                | 0.039 [2.9 – 5.4]<br>10.4 [10.3 – 10.5]<br>91% [87 – 94]                                                         | 10.7 [8.7 – 13.3]<br>8.0 [7.9 – 8.1]<br>102% [98 – 105]                                                                        | 2.3 [2.5 – 4.8]<br>8.7 [8.3 – 9.6]<br>71% [60 – 65]                                                                                |
| <br><b>'1350</b>    | 0.95 [0.74 – 1.24]<br>9.02 [8.9 – 9.1]<br>106% [2.9]<br>*                                                                       | 1.6 [0.7 – 3.6]<br>8.8 [8.4 – 9.2]<br>78% [77 – 80]<br>**                                                                                       | --                                                                                                           | --                                                                                                               | --                                                                                                                             | --                                                                                                                                 |
| <br><b>'8690</b>   | 90.2 [56.7 – 143]<br>7.1 [6.9 – 7.3]<br>100% [4.0]<br>****                                                                      | 473 [109 – 1822]<br>6.3 [5.8 – 7.0]<br>53% [45 – 65]<br>****                                                                                    | --                                                                                                           | --                                                                                                               | --                                                                                                                             | --                                                                                                                                 |

|                                                                                                         |                                                     |                                        |    |                                                     |                                                     |    |
|---------------------------------------------------------------------------------------------------------|-----------------------------------------------------|----------------------------------------|----|-----------------------------------------------------|-----------------------------------------------------|----|
| 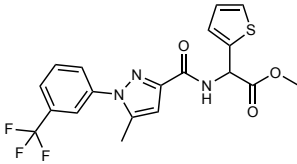 <p><b>'60154</b></p>  | 44.3 [33.9 – 58.0]<br>7.4 [7.2 – 7.5]<br>110% [2.9] | 351 [93]<br>6.5 [7.0]<br>67% [59 – 89] | -- | 25.2 [16 – 40]<br>7.6 [7.4 – 7.8]<br>82% [74 – 189] | 819 [718 – 934]<br>6.1 [6.0 – 6.1]<br>39% [37 – 40] | -- |
|  <p><b>'1066</b></p>   | 1719 [736 – 4048]<br>5.8 [5.4 – 6.1]<br>97% [8.0]   |                                        |    |                                                     |                                                     |    |
|  <p><b>'6000</b></p>   | 1455 [943 – 2249]<br>5.8 [5.7 – 6.0]<br>96% [4.0]   |                                        |    |                                                     |                                                     |    |
|  <p><b>'1081</b></p>   | 116 [76.3 – 178]<br>6.9 [6.8 – 7.1]<br>96% [4.0]    | --                                     | -- | --                                                  | --                                                  | -- |
|  <p><b>'1082</b></p> | 850 [488 – 1491]<br>6.1 [5.8 – 6.3]<br>94% [5.7]    | --                                     | -- | --                                                  | --                                                  | -- |

|                                                                                                         |                                                             |           |           |           |           |           |
|---------------------------------------------------------------------------------------------------------|-------------------------------------------------------------|-----------|-----------|-----------|-----------|-----------|
| 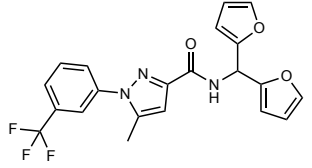 <p><b>'1090</b></p>   | <p>90.8 [42.7 – 192]<br/>7.0 [6.7 – 7.4]<br/>99% [7.13]</p> | <p>--</p> | <p>--</p> | <p>--</p> | <p>--</p> | <p>--</p> |
|  <p><b>'4388</b></p>   | <p>1360 [998 – 1857]<br/>5.9 [5.7 – 6.0]<br/>113% [4.4]</p> | <p>--</p> | <p>--</p> | <p>--</p> | <p>--</p> | <p>--</p> |
|  <p><b>'4051</b></p>   | <p>5328 [3774– 7507]<br/>5.3 [5.1 – 5.4]<br/>103% [3.8]</p> | <p>--</p> | <p>--</p> | <p>--</p> | <p>--</p> | <p>--</p> |
|  <p><b>'4156</b></p>  | <p>13.5 [6.3 – 30.1]<br/>7.9 [7.5 – 8.2]<br/>91% [7.5]</p>  | <p>--</p> | <p>--</p> | <p>--</p> | <p>--</p> | <p>--</p> |
|  <p><b>'4936</b></p> | <p>7.5 [3.9 – 14.3]<br/>8.1 [7.9 – 8.4]<br/>88% [6.3]</p>   | <p>--</p> | <p>--</p> | <p>--</p> | <p>--</p> | <p>--</p> |

|                                                                                                          |                                                              |    |    |    |    |    |
|----------------------------------------------------------------------------------------------------------|--------------------------------------------------------------|----|----|----|----|----|
| 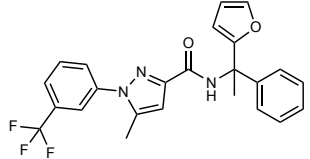 <p><b>'5806</b></p>    | <p>8.0 [3.0 – 21.8]<br/>8.1 [7.7 – 8.5]<br/>100% [10.5]</p>  |    |    |    |    |    |
|  <p><b>'6425</b></p>    | <p>934 [583 – 1501]<br/>6.0 [5.8 – 6.2]<br/>108% [5.8]</p>   | -- | -- | -- | -- | -- |
|  <p><b>'6829</b></p>    | <p>1046 [669 – 1643]<br/>6.0 [5.8 – 6.2]<br/>106% [5.8]</p>  | -- | -- | -- | -- | -- |
|  <p><b>'8079</b></p>   | <p>18.5 [13.8 – 25.0]<br/>7.7 [7.6 – 7.9]<br/>104% [3.0]</p> | -- | -- | -- | -- | -- |
|  <p><b>'12565</b></p> | <p>301 [195 – 462]<br/>6.5 [6.3 – 6.7]<br/>97% [4.0]</p>     | -- | -- | -- | -- | -- |

|                                                                                                         |                                                               |    |                                                       |      |          |          |
|---------------------------------------------------------------------------------------------------------|---------------------------------------------------------------|----|-------------------------------------------------------|------|----------|----------|
| 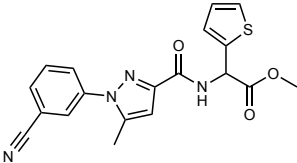 <p><b>'31604</b></p>  | <p>801 [596 – 1,076]<br/>6.1 [6.0 – 6.2]<br/>100% [2.8]</p>   | -- | --                                                    | --   | --       | --       |
|  <p><b>'10010</b></p>  | <p>1,196 [952 – 1,505]<br/>5.9 [5.8 – 6.0]<br/>101% [2.9]</p> | -- | --                                                    | N.D. | > 10,000 | --       |
|  <p><b>'6439</b></p>   | <p>251 [173 – 364]<br/>6.6 [6.4 – 6.8]<br/>106% [3.9]</p>     | -- | --                                                    | N.D. | > 10,000 | --       |
|  <p><b>'6448</b></p>  | <p>866 [564 – 1,317]<br/>6.1 [5.9 – 6.3]<br/>103% [4.1]</p>   | -- | --                                                    | --   | --       | --       |
|  <p><b>'3737</b></p> | <p>173 [94 – 322]<br/>6.76 [6.5 – 7.03]<br/>112% [8.8]</p>    | -- | 326 [168 – 1044]<br>6.5 [6.0 – 6.8]<br>99% [91 – 135] | N.D. | > 10,000 | > 10,000 |
|  <p><b>'5424</b></p> | <p>876 [683 – 1123]<br/>6.1 [6.0 – 6.2]<br/>104% [2.6]</p>    | -- | --                                                    | --   | --       | --       |



|                                                                                                          |                                                            |    |    |    |    |    |
|----------------------------------------------------------------------------------------------------------|------------------------------------------------------------|----|----|----|----|----|
| 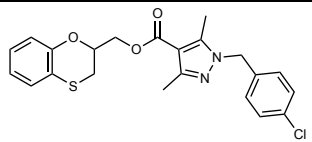 <p><b>'5463</b></p>    | <p>825 [396 – 1,755]<br/>6.1 [5.8 – 6.4]<br/>88% [6.6]</p> | -- | -- | -- | -- | -- |
|  <p><b>'2153</b></p>    | <p>163 [90 – 287]<br/>6.79 [6.5 – 7.0]<br/>82.6% [4.5]</p> | -- | -- | -- | -- | -- |
|  <p><b>Nabilone</b></p> | <p>2.3 [1.4 – 3.8]<br/>8.6 [8.4 – 8.9]<br/>81% [3.7]</p>   | -- | -- | -- | -- | -- |

N.D. = best fit values were not determined due to compound inactivity or poor data quality

-- Not tested

<sup>a</sup>One-way ANOVA statistical significance of individual comparisons to CP-55,940 after correction with Dunnett's test of multiple hypotheses. ns = not significant, \* p<0.05, \*\* p<0.01, \*\*\* p<0.001, \*\*\*\* p<0.001

**Supplementary Table 3. Cryo-EM data collection, model refinement, and validation statistics.**

| <b>Data Collection</b>                                | <b>Global Refinement</b>          |
|-------------------------------------------------------|-----------------------------------|
| Voltage (kV)                                          | 300                               |
| Magnification                                         | 96,000                            |
| Total electron dose (e <sup>-</sup> /Å <sup>2</sup> ) | 56.6                              |
| Defocus range (μm)                                    | -0.7 - -2.0                       |
| Calibrated pixel size (Å)                             | 0.8521                            |
| Micrographs collected                                 | 8324                              |
| <b>Data Processing</b>                                |                                   |
| Extracted particles                                   | 4,967,593                         |
| Particles used for final reconstruction               | 465,411                           |
| Final map resolution (Å, 0.143 FSC)                   | 3.3                               |
| Map resolution range (Å)                              | 2.6 - 4.2                         |
| Map sharpening B factor (Å <sup>2</sup> )             | 175.3                             |
| <b>Model Content</b>                                  |                                   |
| Initial models used (PDB code)                        | 6N4B (CB1/G <sub>i</sub> /scFv16) |
| Total number of atoms                                 | 8,528                             |
| No. of protein residues                               | 1116                              |
| No. of ligands                                        | 1                                 |
| <b>Model Validation</b>                               |                                   |
| CC map vs. model (%)                                  | 69.05                             |
| RMSD                                                  |                                   |
| Bond lengths (Å) / Bond angles (°)                    | 0.003 / 0.663                     |
| Ramachandran plot statistics                          |                                   |
| Favored (%)                                           | 94.12                             |
| Allowed (%)                                           | 5.88                              |
| Outliers (%)                                          | 0.0                               |
| Rotamer outliers (%)                                  | 0.0                               |
| C-beta deviations                                     | 0.0                               |
| Clash score                                           | 7.19                              |

**Supplementary Table 4. Functional activities for select analogs versus a variety of transducers and hCB1 in the bioSens-All® platform.**

| Compound  |                                | hCB1 G <sub>1</sub> | hCB1 G <sub>oB</sub> | hCB1 G <sub>z</sub>   |
|-----------|--------------------------------|---------------------|----------------------|-----------------------|
| CP-55,940 | EC <sub>50</sub> [95% CI] (nM) | 0.46 [0.4 – 0.5]    | 0.63 [0.6 – 0.7]     | 0.28 [0.18 – 0.5]     |
|           | pEC <sub>50</sub> [95% CI]     | 9.3 [9.3 – 9.4]     | 9.2 [9.2 – 9.3]      | 9.6 [9.4 – 9.8]       |
|           | E <sub>max</sub> [95% CI]      | 100 [98 – 102]      | 100 [99 – 101]       | 102 [102 – 104]       |
| '51486    | EC <sub>50</sub> [95% CI] (nM) | 849 [745– 947]      | 711 [579– 873]       | 1118 [363– 3447]      |
|           | pEC <sub>50</sub> [95% CI]     | 6.1 [6.0 – 6.1]     | 6.2 [6.1 – 6.2]      | 6.0 [5.5 – 6.4]       |
|           | E <sub>max</sub> [95% CI]      | 73 [70 – 75]        | 74 [70 – 75]         | 130 [996 – 163]       |
| '60154    | EC <sub>50</sub> [95% CI] (nM) | 2.5 [1.9 – 3.4]     | 18.4 [15.8– 21.5]    | 17.5 [7.5 – 41]       |
|           | pEC <sub>50</sub> [95% CI]     | 7.6 [7.5 – 7.7]     | 7.7 [7.7 – 7.8]      | 7.8 [7.4 – 8.1]       |
|           | E <sub>max</sub> [95% CI]      | 92 [90 – 94]        | 100 [98 – 100]       | 121 [103 – 140]       |
| '1081     | EC <sub>50</sub> [95% CI] (nM) | 150 [116 – 197]     | 91.7 [55 – 153]      | 225 [73 – 694]        |
|           | pEC <sub>50</sub> [95% CI]     | 6.8 [6.7 – 6.9]     | 7.0 [6.8 – 7.3]      | 6.7 [6.2 – 7.1]       |
|           | E <sub>max</sub> [95% CI]      | 49 [48 – 51]        | 45 [43 – 47]         | 72 [55 – 89]          |
| '1082     | EC <sub>50</sub> [95% CI] (nM) | °N.D.               | N.D.                 | N.D.                  |
|           | pEC <sub>50</sub> [95% CI]     |                     |                      |                       |
|           | E <sub>max</sub> [95% CI]      |                     |                      |                       |
| '1087     | EC <sub>50</sub> [95% CI] (nM) | N.D.                | N.D.                 | N.D.                  |
|           | pEC <sub>50</sub> [95% CI]     |                     |                      |                       |
|           | E <sub>max</sub> [95% CI]      |                     |                      |                       |
| '1090     | EC <sub>50</sub> [95% CI] (nM) | 35.6 [28.5 – 45]    | 37.3 [30 – 47]       | 126 [45 – 354]        |
|           | pEC <sub>50</sub> [95% CI]     | 7.5 [7.3 – 7.5]     | 7.4 [7.3 – 7.5]      | 6.9 [6.5 – 7.4]       |
|           | E <sub>max</sub> [95% CI]      | 81 [80 – 82]        | 90 [88 – 92]         | 115 [92 – 137]        |
| '4388     | EC <sub>50</sub> [95% CI] (nM) | N.D.                | N.D.                 | N.D.                  |
|           | pEC <sub>50</sub> [95% CI]     |                     |                      |                       |
|           | E <sub>max</sub> [95% CI]      |                     |                      |                       |
| '6829     | EC <sub>50</sub> [95% CI] (nM) | 4056 [2417 – 9228]  | 1011 [706 – 1449]    | 1347 [720 – 2522]     |
|           | pEC <sub>50</sub> [95% CI]     | 5.4 [5.0 – 5.6]     | 6.0 [5.8 – 6.2]      | 5.9 [6.0 – 6.2]       |
|           | E <sub>max</sub> [95% CI]      | 68 [57 – 77]        | 49 [45 – 53]         | 70 [57 – 83]          |
| '4051     | EC <sub>50</sub> [95% CI] (nM) | 6523 [5770 – 7511]  | 7988 [6709 – 9511]   | 2431 [1069 – 5531]    |
|           | pEC <sub>50</sub> [95% CI]     | 5.2 [5.1 – 5.2]     | 5.1 [5.0 – 5.2]      | 5.6 [5.3 – 6.0]       |
|           | E <sub>max</sub> [95% CI]      | 108 [104 – 113]     | 115 [106 – 121]      | 114 [86 – 141]        |
| '12565    | EC <sub>50</sub> [95% CI] (nM) | 104 [79 – 138]      | 44.8 [27 – 73]       | 54.6 [22.1 – 135]     |
|           | pEC <sub>50</sub> [95% CI]     | 7.0 [6.9 – 7.1]     | 7.4 [7.1 – 7.6]      | 7.3 [6.9 – 7.7]       |
|           | E <sub>max</sub> [95% CI]      | 28 [27 – 28]        | 25 [24 – 26]         | 51 [41 – 61]          |
| '10010    | EC <sub>50</sub> [95% CI] (nM) | 814 [717 – 932]     | 801 [582– 1102]      | 1396 [506 – 3853]     |
|           | pEC <sub>50</sub> [95% CI]     | 6.1 [6.0 – 6.1]     | 6.1 [6.0 – 6.2]      | 5.9 [5.4 – 6.3]       |
|           | E <sub>max</sub> [95% CI]      | 74 [70 – 74]        | 71 [67 – 75]         | 144 [113 – 175]       |
| '6439     | EC <sub>50</sub> [95% CI] (nM) | 65.5 [56.8 – 755]   | 60.9 [52.9 – 70]     | 339 [96 – 1195]       |
|           | pEC <sub>50</sub> [95% CI]     | 7.2 [7.1 – 7.2]     | 7.2 [7.2 – 7.3]      | 6.5 [5.9 – 7.0]       |
|           | E <sub>max</sub> [95% CI]      | 95 [93 – 96]        | 100 [99 – 101]       | 162 [125 – 199]       |
| '6448     | EC <sub>50</sub> [95% CI] (nM) | 345 [321 – 372]     | 310 [267 – 360]      | 728 [381 – 1393]      |
|           | pEC <sub>50</sub> [95% CI]     | 6.5 [6.4 – 6.5]     | 6.5 [6.4 – 6.6]      | 6.1 [5.9 – 6.4]       |
|           | E <sub>max</sub> [95% CI]      | 87 [86 – 88]        | 90 [87 – 91]         | 151 [130 – 172]       |
| '3737a    | EC <sub>50</sub> [95% CI] (nM) | 2804 [2436 – 3285]  | 6729 [2678 – 16910]  | 2470 [998 – 6108]     |
|           | pEC <sub>50</sub> [95% CI]     | 5.6 [5.5 – 5.6]     | 5.2 [4.8 – 5.6]      | 5.6 [5.2 – 6.1]       |
|           | E <sub>max</sub> [95% CI]      | 98 [94 – 102]       | 118 [94 – 143]       | 140 [9109 – 172]      |
| '3737b    | EC <sub>50</sub> [95% CI] (nM) | 3026 [2486 – 3822]  | 19780 [4343 – 90080] | 30840 [1133 – 839000] |
|           | pEC <sub>50</sub> [95% CI]     | 5.5 [5.4 – 5.6]     | 4.7 [4.1 – 5.4]      | 4.5 [3.1– 6.0]        |
|           | E <sub>max</sub> [95% CI]      | 89 [84 – 94]        | 152 [94 – 208]       | 231 [34 – 428]        |
| '3737c    | EC <sub>50</sub> [95% CI] (nM) | N.D.                | N.D.                 | N.D.                  |
|           | pEC <sub>50</sub> [95% CI]     |                     |                      |                       |
|           | E <sub>max</sub> [95% CI]      |                     |                      |                       |
| '3737d    | EC <sub>50</sub> [95% CI] (nM) | N.D.                | N.D.                 | N.D.                  |
|           | pEC <sub>50</sub> [95% CI]     |                     |                      |                       |
|           | E <sub>max</sub> [95% CI]      |                     |                      |                       |

|       |                                                                                           |                                                              |                                                           |                 |
|-------|-------------------------------------------------------------------------------------------|--------------------------------------------------------------|-----------------------------------------------------------|-----------------|
| '7019 | EC <sub>50</sub> [95% CI] (nM)<br>pEC <sub>50</sub> [95% CI]<br>E <sub>max</sub> [95% CI] | N.D.                                                         | N.D.                                                      | b <sub>--</sub> |
| '5424 | EC <sub>50</sub> [95% CI] (nM)<br>pEC <sub>50</sub> [95% CI]<br>E <sub>max</sub> [95% CI] | N.D.                                                         | N.D.                                                      | --              |
| '7800 | EC <sub>50</sub> [95% CI] (nM)<br>pEC <sub>50</sub> [95% CI]<br>E <sub>max</sub> [95% CI] | 6793 [983]<br>5.2 [6.0]<br>34 [24]                           | 597 [398 – 1017]<br>6.2 [5.9 – 6.4]<br>21 [20 – 23]       | --              |
| '5463 | EC <sub>50</sub> [95% CI] (nM)<br>pEC <sub>50</sub> [95% CI]<br>E <sub>max</sub> [95% CI] | 4941 [1763 –<br>26860000]<br>5.3 [3.4 – 5.8]<br>31 [24 – 88] | 7472 [1125]<br>5.1 [6.0]<br>32 [22]                       | --              |
| '0450 | EC <sub>50</sub> [95% CI] (nM)<br>pEC <sub>50</sub> [95% CI]<br>E <sub>max</sub> [95% CI] | 56310 [2177]<br>4.3 [5.7]<br>49 [26]                         | 2509 [680 – 11020000]<br>5.6 [3.0 – 6.2]<br>36 [30 – 117] | --              |
| '2153 | EC <sub>50</sub> [95% CI] (nM)<br>pEC <sub>50</sub> [95% CI]<br>E <sub>max</sub> [95% CI] | 1011 [371 – 6576]<br>6.0 [5.2 – 6.4]<br>89 [78 – 118]        | 2061 [620 – 25390]<br>5.7 4.6 – 6.2]<br>109 [91 – 162]    | --              |

<sup>a</sup>N.D. = best fit values were not able to be determined due to compound inactivity or poor data quality

<sup>b</sup>-- Not tested

**Supplementary Table 5. Detailed functional activities for select analogs and controls versus a variety of transducers and hCB1 in the bioSens-All® platform.**

| Compound  |                                | hCB1 G <sub>i1</sub> | hCB1 G <sub>i2</sub> | hCB1 G <sub>oB</sub> | hCB1 G <sub>z</sub> | hCB1 G <sub>i3</sub> | hCB1 G <sub>i5</sub> | hCB1 Barr2 + GRK2 |
|-----------|--------------------------------|----------------------|----------------------|----------------------|---------------------|----------------------|----------------------|-------------------|
| CP-55,940 | EC <sub>50</sub> [95% CI] (nM) | 0.46 [0.4 – 0.5]     | 0.55 [0.4 – 0.7]     | 0.63 [0.6 – 0.7]     | 0.28 [0.18 – 0.5]   | 2.4 [1.65 – 3.4]     | 0.26 [0.22 – 2.9]    | 3.1 [1.97 – 4.8]  |
|           | pEC <sub>50</sub> [95% CI]     | 9.34 [9.3 – 9.4]     | 9.26 [9.1 – 9.4]     | 9.20 [9.2 – 9.3]     | 9.55 [9.4 – 9.8]    | 8.62 [8.5 – 8.8]     | 9.59 [9.5 – 9.7]     | 8.51 [8.3 – 8.7]  |
|           | E <sub>max</sub> [95% CI]      | 100 [98 – 102]       | 100 [96 – 103]       | 100 [98 – 101]       | 101 [96 – 107]      | 100 [95 – 105]       | 100 [98 – 102]       | 89 [82 – 98]      |
| '4042     | EC <sub>50</sub> [95% CI] (nM) | 0.48 [0.4 – 0.6]     | 0.56 [0.4 – 0.9]     | 0.64 [0.5 – 0.8]     | 0.43 [0.3 – 0.6]    | 2.1 [0.5 – 9.6]      | 0.37 [0.28 – 0.49]   | 3.6 [2.1 – 6.8]   |
|           | pEC <sub>50</sub> [95% CI]     | 9.32 [9.2 – 9.4]     | 9.25 [9.0 – 9.5]     | 9.20 [9.1 – 9.3]     | 9.37 [9.3 – 9.4]    | 8.69 [8.0 – 9.3]     | 9.43 [9.3 – 9.6]     | 8.44 [8.2 – 8.7]  |
|           | E <sub>max</sub> [95% CI]      | 102 [100 – 104]      | 101 [95 – 106]       | 103 [99 – 106]       | 97 [93 – 102]       | 64 [54 – 84]         | 105 [102 – 108]      | 72 [71 – 74]      |
| '1350     | EC <sub>50</sub> [95% CI] (nM) | 0.23 [0.18 – 0.3]    | 0.28 [0.19 – 0.4]    | 0.29 [0.24 – 0.34]   | 0.35 [0.22 – 0.53]  | 0.83 [0.23 – 2.7]    | 0.22 [0.18 – 0.27]   | 2.2 [1.1 – 4.4]   |
|           | pEC <sub>50</sub> [95% CI]     | 9.63 [9.5 – 9.7]     | 9.54 [9.4 – 9.7]     | 9.54 [9.5 – 9.6]     | 9.46 [9.3 – 9.7]    | 9.08 [8.6 – 9.6]     | 9.66 [9.6 – 9.8]     | 8.66 [8.4 – 9.0]  |
|           | E <sub>max</sub> [95% CI]      | 92 [90 – 95]         | 95 [90 – 99]         | 98 [94 – 98]         | 94 [88 – 100]       | 56 [48 – 67]         | 99 [96 – 101]        | 63 [60 – 72]      |
| '8690     | EC <sub>50</sub> [95% CI] (nM) | 19.1 [14.4 – 25.8]   |                      | 18 [14 – 23]         | 33 [15 – 117]       |                      |                      |                   |
|           | pEC <sub>50</sub> [95% CI]     | 7.72 [7.6 – 7.8]     | <sup>b</sup> --      | 7.8 [7.7 – 7.9]      | 7.5 [6.9 – 7.8]     | --                   | --                   | <sup>a</sup> N.D. |
|           | E <sub>max</sub> [95% CI]      | 82 [77 – 85]         |                      | 83 [80 – 87]         | 98 [86 – 121]       |                      |                      |                   |
| 2-AG      | EC <sub>50</sub> [95% CI] (nM) | 224 [147 – 353]      | 62 [42 – 918]        | 93 [65 – 135]        | 493 [15]            | 4470 [1618 – 398200] | 32 [25 – 40]         | 1025 [774 – 1446] |
|           | pEC <sub>50</sub> [95% CI]     | 6.65 [6.5 – 6.8]     | 7.2 [7.0 – 7.4]      | 7.0 [6.9 – 7.2]      | 6.3 [7.8]           | 5.4 [5.1 – 5.8]      | 7.5 [7.4 – 7.6]      | 6.0 [5.8 – 6.1]   |
|           | E <sub>max</sub> [95% CI]      | 122 [113 – 133]      | 112 [106 – 119]      | 114 [108 – 121]      | 205 [112]           | 183 [133 – 607]      | 112 [108 – 116]      | 200 [184 – 220]   |

<sup>a</sup>N.D. = best fit values were not able to be determined due to compound inactivity or poor data quality

<sup>b</sup>-- Not tested

**Supplementary Table 6. Relative efficacy calculations for '4042 and '1350 versus CP-55,940.**

| Target                     | Sensor                     | Compound  | Mean log (E <sub>max</sub> /EC <sub>50</sub> ) | SEM log (E <sub>max</sub> /EC <sub>50</sub> ) | Mean Δlog (E <sub>max</sub> /EC <sub>50</sub> ) | SEM Δlog (E <sub>max</sub> /EC <sub>50</sub> ) | t-test to CP-55,940 <sup>a</sup> | RE <sup>b</sup> |
|----------------------------|----------------------------|-----------|------------------------------------------------|-----------------------------------------------|-------------------------------------------------|------------------------------------------------|----------------------------------|-----------------|
| hCB1                       | G <sub>i1</sub>            | CP-55,940 | 9.34                                           | 0.07                                          | 0.00                                            | 0.09                                           |                                  | 1.00            |
|                            |                            | '4042     | 9.33                                           | 0.14                                          | -0.01                                           | 0.15                                           | ns                               | 0.97            |
|                            |                            | '1350     | 9.59                                           | 0.06                                          | 0.30                                            | 0.09                                           | ****                             | 1.98            |
|                            | G <sub>i2</sub>            | CP-55,940 | 9.24                                           | 0.13                                          | 0.00                                            | 0.18                                           |                                  | 1.00            |
|                            |                            | '4042     | 9.25                                           | 0.03                                          | 0.01                                            | 0.13                                           | ns                               | 1.01            |
|                            |                            | '1350     | 9.52                                           | 0.03                                          | 0.28                                            | 0.13                                           | **                               | 1.89            |
|                            | G <sub>oB</sub>            | CP-55,940 | 9.19                                           | 0.07                                          | 0.00                                            | 0.10                                           |                                  | 1.00            |
|                            |                            | '4042     | 9.21                                           | 0.09                                          | 0.02                                            | 0.11                                           | ns                               | 1.04            |
|                            |                            | '1350     | 9.09                                           | 0.44                                          | 0.35                                            | 0.44                                           | ****                             | 2.24            |
|                            | G <sub>z</sub>             | CP-55,940 | 9.53                                           | 0.23                                          | 0.00                                            | 0.33                                           |                                  | 1.00            |
|                            |                            | '4042     | 9.32                                           | 0.19                                          | -0.21                                           | 0.30                                           | ns                               | 0.62            |
|                            |                            | '1350     | 9.42                                           | 0.22                                          | -0.11                                           | 0.32                                           | ns                               | 0.77            |
|                            | G <sub>13</sub>            | CP-55,940 | 8.63                                           | 0.23                                          | 0.00                                            | 0.32                                           |                                  | 1.00            |
|                            |                            | '4042     | 8.59                                           | 0.25                                          | -0.04                                           | 0.33                                           | ns                               | 0.91            |
|                            |                            | '1350     | 8.85                                           | 0.05                                          | 0.22                                            | 0.23                                           | *                                | 1.64            |
|                            | G <sub>15</sub>            | CP-55,940 | 9.59                                           | 0.02                                          | 0.00                                            | 0.02                                           |                                  | 1.00            |
|                            |                            | '4042     | 9.46                                           | 0.12                                          | -0.13                                           | 0.12                                           | ns                               | 0.74            |
|                            |                            | '1350     | 9.65                                           | 0.06                                          | 0.06                                            | 0.06                                           | ns                               | 1.14            |
| β <sub>arr2+</sub><br>GRK2 | CP-55,940                  | 8.28      | 0.25                                           | 0.00                                          | 0.35                                            |                                                | 1.00                             |                 |
|                            | '4042                      | 8.19      | 0.03                                           | -0.09                                         | 0.03                                            | *                                              | 0.81                             |                 |
|                            | '1350                      | 8.34      | 0.08                                           | 0.06                                          | 0.08                                            | ns                                             | 1.16                             |                 |
| hCB2                       | G <sub>i1</sub>            | CP-55,940 | 8.86                                           | 0.12                                          | 0.00                                            | 0.17                                           |                                  | 1.00            |
|                            |                            | '4042     | 8.49                                           | 0.03                                          | -0.20                                           | 0.13                                           | ns                               | 0.63            |
|                            |                            | '1350     | 8.32                                           | 0.10                                          | -0.54                                           | 0.16                                           | *                                | 0.29            |
|                            | G <sub>i2</sub>            | CP-55,940 | 8.97                                           | 0.00                                          | 0.00                                            | 0.00                                           |                                  | 1.00            |
|                            |                            | '4042     | 8.74                                           | 0.00                                          | -0.23                                           | 0.00                                           | c--                              | 0.59            |
|                            |                            | '1350     | 8.57                                           | 0.00                                          | -0.40                                           | 0.00                                           | --                               | 0.40            |
|                            | G <sub>oB</sub>            | CP-55,940 | 8.76                                           | 0.09                                          | 0.00                                            | 0.13                                           |                                  | 1.00            |
|                            |                            | '4042     | 8.43                                           | 0.19                                          | -0.33                                           | 0.21                                           | n.s.                             | 0.47            |
|                            |                            | '1350     | 8.36                                           | 0.01                                          | -0.40                                           | 0.09                                           | ***                              | 0.40            |
|                            | G <sub>z</sub>             | CP-55,940 | 8.90                                           | 0.39                                          | 0.00                                            | 0.55                                           |                                  | 1.00            |
|                            |                            | '4042     | 8.48                                           | 0.51                                          | -0.42                                           | 0.64                                           | n.s.                             | 0.38            |
|                            |                            | '1350     | 8.24                                           | 0.23                                          | -0.65                                           | 0.45                                           | n.s.                             | 0.22            |
|                            | β <sub>arr2+</sub><br>GRK2 | CP-55,940 | 7.83                                           | 0.13                                          | 0.00                                            | 0.18                                           |                                  | 1.00            |
|                            |                            | '4042     | 7.74                                           | 0.00                                          | -0.09                                           | 0.13                                           | ***                              | 0.82            |
|                            |                            | '1350     | 7.79                                           | 0.09                                          | -0.04                                           | 0.16                                           | n.s.                             | 0.92            |

<sup>a</sup>Statistical significance of all comparisons of compound activities (Mean Δlog (E<sub>max</sub>/EC<sub>50</sub>)) to CP-55,940 control by unpaired t-test. ns = not significant, \* p<0.05, \*\* p<0.01, \*\*\* p<0.001, \*\*\*\* p<0.0001

<sup>b</sup>RE, relative efficacy = 10<sup>Δlog (E<sub>max</sub>/EC<sub>50</sub>)</sup>

<sup>c</sup>--, not determined

**Supplementary Table 7. Binding affinities and functional activities for select active analogs at CB2.**

| Compound                                                                                              | rCB2 binding<br>EC <sub>50</sub> [95% CI] (nM)<br>pEC <sub>50</sub> [95% CI]<br>E <sub>max</sub> [SEM] | hCB2<br>Cerep cAMP<br>EC <sub>50</sub> [95% CI] (nM)<br>pEC <sub>50</sub> [95% CI]<br>E <sub>max</sub> [95% CI] | hCB2<br>BRET2 + GoA<br>EC <sub>50</sub> [95% CI] (nM)<br>pEC <sub>50</sub> [95% CI]<br>E <sub>max</sub> [95% CI] | hCB2<br>Tango<br>β-arrestin<br>recruitment<br>EC <sub>50</sub> [95% CI] (nM)<br>pEC <sub>50</sub> [95% CI]<br>E <sub>max</sub> [95% CI] |
|-------------------------------------------------------------------------------------------------------|--------------------------------------------------------------------------------------------------------|-----------------------------------------------------------------------------------------------------------------|------------------------------------------------------------------------------------------------------------------|-----------------------------------------------------------------------------------------------------------------------------------------|
| 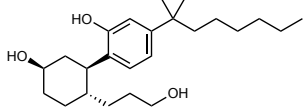<br><b>CP-55,940</b> | --                                                                                                     | 0.082                                                                                                           | 13.1 [9.4 – 18.5]<br>7.9 [7.7 – 8.0]<br>99% [94 – 105]                                                           | 22.9 [21.3 – 24.8]<br>7.6 [7.60 – 7.67]<br>100% [98 – 102]                                                                              |
| <br><b>'4042</b>     | 2.18 [1.7 – 2.8]<br>8.7 [8.6 – 8.8]<br>103% [8.8]                                                      | 0.011 [0.002 – 0.02]<br>10.95 [10.7 – 11.6]<br>72% [77 – 84]                                                    | 7.9 [1.6 – 40.6]<br>8.1 [7.4 – 8.8]<br>29% [22 – 36]                                                             | 33.9 [21.7 – 61.5]<br>7.5 [7.2 – 7.7]<br>28% [26 – 32]                                                                                  |
| <br><b>'60154</b>   | b <sub>---</sub>                                                                                       | --                                                                                                              | 594 [125 – 2813]<br>6.2 [5.6 – 6.9]<br>31% [20 – 42]                                                             | 3341 [2707 – 4371]<br>5.5 [5.4 – 5.6]<br>21% [19 – 23]                                                                                  |
| <br><b>10010</b>   | --                                                                                                     | --                                                                                                              | <sup>a</sup> N.D.                                                                                                | 556 [506 – 611]<br>6.3 [6.2 – 6.3]<br>18% [17 – 19]                                                                                     |

|                                                                                                       |    |                                                          |                                                          |                                                     |
|-------------------------------------------------------------------------------------------------------|----|----------------------------------------------------------|----------------------------------------------------------|-----------------------------------------------------|
| 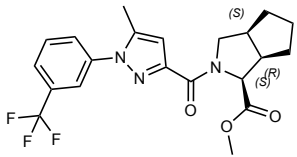 <p><b>'6439</b></p> | -- | --                                                       | 97.1 [12.6 – 749]<br>7.0 [6.13 – 67.9]<br>81% [34 – 128] | 338 [282– 415]<br>6.5 [6.4 – 6.6]<br>14% [13 – 15]  |
|  <p><b>'6448</b></p> | -- | --                                                       | --                                                       | --                                                  |
|  <p><b>'3737</b></p> | -- | 4.3 [.0004 – 22.6]<br>8.4 [7.7 – 12.5]<br>45% [42 – 80%] | N.D.                                                     | 1500 [1274 – 1805]<br>5.8 [5.7 – 5.9]<br>9% [8 – 9] |

<sup>a</sup>N.D. = best fit values were not determined due to compound inactivity or poor data quality

<sup>b</sup>-- Not tested



**Supplementary Table 8. Functional activities for select analogs and controls versus a variety of transducers and hCB2 in the bioSensAll platform.**

| Compound  |                                | hCB2 G <sub>i1</sub> | hCB2 G <sub>i2</sub> | hCB2 G <sub>oB</sub> | hCB2 G <sub>z</sub> | hCB2 Barr2 + GRK2  |
|-----------|--------------------------------|----------------------|----------------------|----------------------|---------------------|--------------------|
| CP-55,940 | EC <sub>50</sub> [95% CI] (nM) | 1.4 [1.1 – 1.7]      | 1.1 [0.9 – 1.3]      | 1.7 [1.5 – 2.1]      | 1.05 [0.6 – 1.9]    | 14.3 [11.6 – 17.9] |
|           | pEC <sub>50</sub> [95% CI]     | 8.87 [8.7 – 8.9]     | 8.97 [8.9 – 9.1]     | 8.76 [8.7 – 8.8]     | 8.98 [8.7 – 9.2]    | 7.84 [7.8 – 7.9]   |
|           | E <sub>max</sub> [95% CI]      | 100 [97 – 103]       | 100 [97 – 104]       | 100 [98 – 103]       | 98 [89 – 109]       | 100 [95 – 104]     |
| '4042     | EC <sub>50</sub> [95% CI] (nM) | 2.7 [2.0 – 3.4]      | 1.3 [0.9 – 1.7]      | 2.5 [1.9 – 3.3]      | 1.36 [0.5 – 3.1]    | 5.5 [3.5 – 8.7]    |
|           | pEC <sub>50</sub> [95% CI]     | 8.58 [8.5 – 8.7]     | 8.90 [8.8 – 9.0]     | 8.60 [8.5 – 8.7]     | 8.87 [8.5 – 9.3]    | 8.26 [8.1 – 8.5]   |
|           | E <sub>max</sub> [95% CI]      | 82 [79 – 85]         | 70 [67 – 73]         | 61 [59 – 63]         | 56 [47 – 68]        | 33 [33 – 33]       |
| '1350     | EC <sub>50</sub> [95% CI] (nM) | 3.55 [2.98 – 4.2]    | 1.6 [1.4 – 1.9]      | 2.6 [2.15 – 3.1]     | 2.6 [1.6 – 3.9]     | 4.2 [2.8 – 6.3]    |
|           | pEC <sub>50</sub> [95% CI]     | 8.45 [8.4 – 8.5]     | 8.79 [8.7 – 8.9]     | 8.58 [8.5 – 8.7]     | 8.58 [8.4 – 8.8]    | 8.38 [8.2 – 8.6]   |
|           | E <sub>max</sub> [95% CI]      | 74 [72 – 77]         | 61 [59 – 63]         | 59 [57 – 61]         | 52 [46 – 60]        | 30 [28 – 33]       |
| 2-AG      | EC <sub>50</sub> [95% CI] (nM) | 217 [186 – 256]      | 96 [70 – 129]        | 394 [349 – 447]      | 2123 [931 – 87070]  | 1854 [1110–4061]   |
|           | pEC <sub>50</sub> [95% CI]     | 6.66 [6.6 – 6.7]     | 7.0 [6.9 – 7.2]      | 6.4 [6.3 – 6.5]      | 5.7 [4.1 – 6.0]     | 5.7 [5.4 – 6.0]    |
|           | E <sub>max</sub> [95% CI]      | 105 [102 – 109]      | 78 [74 – 84]         | 101 [98 – 104]       | 96 [76 – 233]       | 118 [104 – 140]    |
