# Supplementary material for: Large library docking for cannabinoid-1 receptor agonists with reduced side effects
Source: PubMed Central journal article supplement (PMC10849508; doi:10.1101/2023.02.27.530254), 2024-01-23
Supplement: NIHPP2023.02.27.530254v2-supplement-3.pdf [file NIHPP2023.02.27.530254v2-supplement-3.pdf]

## Supplemental Data Figures

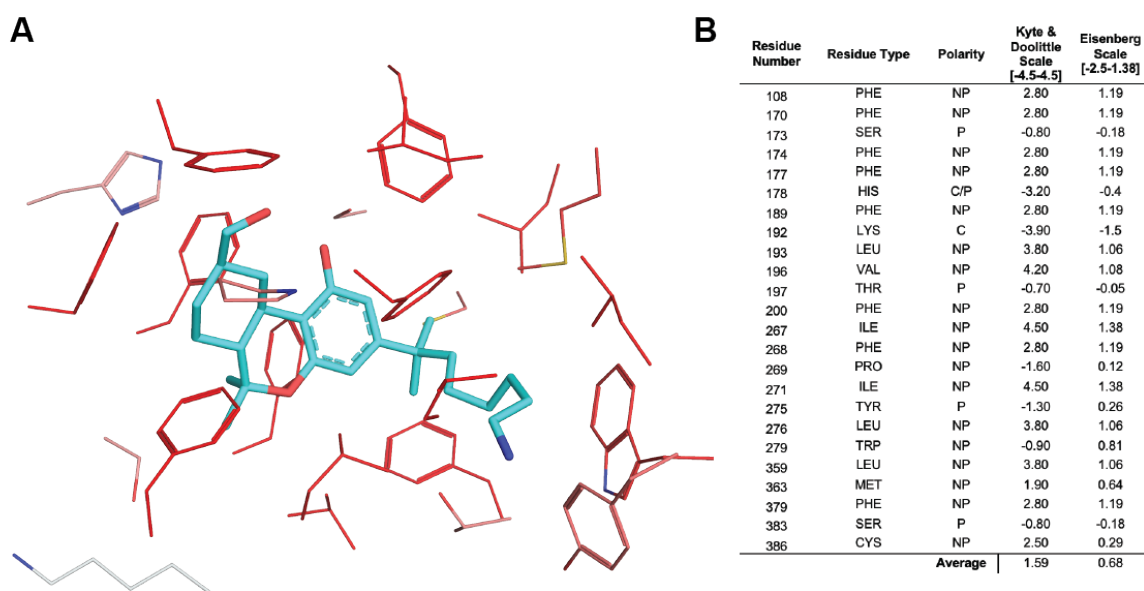

**Figure S1.** Hydrophobicity calculations for the hCB1R orthosteric pocket based on PDB: 5XR8. Residues within 5 Å of AM841 are considered. **A.** Depiction of the hCB1 orthosteric pocket, colored by the Eisenberg Scale, where darker red colors indicate more hydrophobic residues and lighter red or gray colors indicate less hydrophobic residues. **B.** A table of the residues within 5 Å of AM841, with their polarity class, and two hydrophobicity scores indicated.

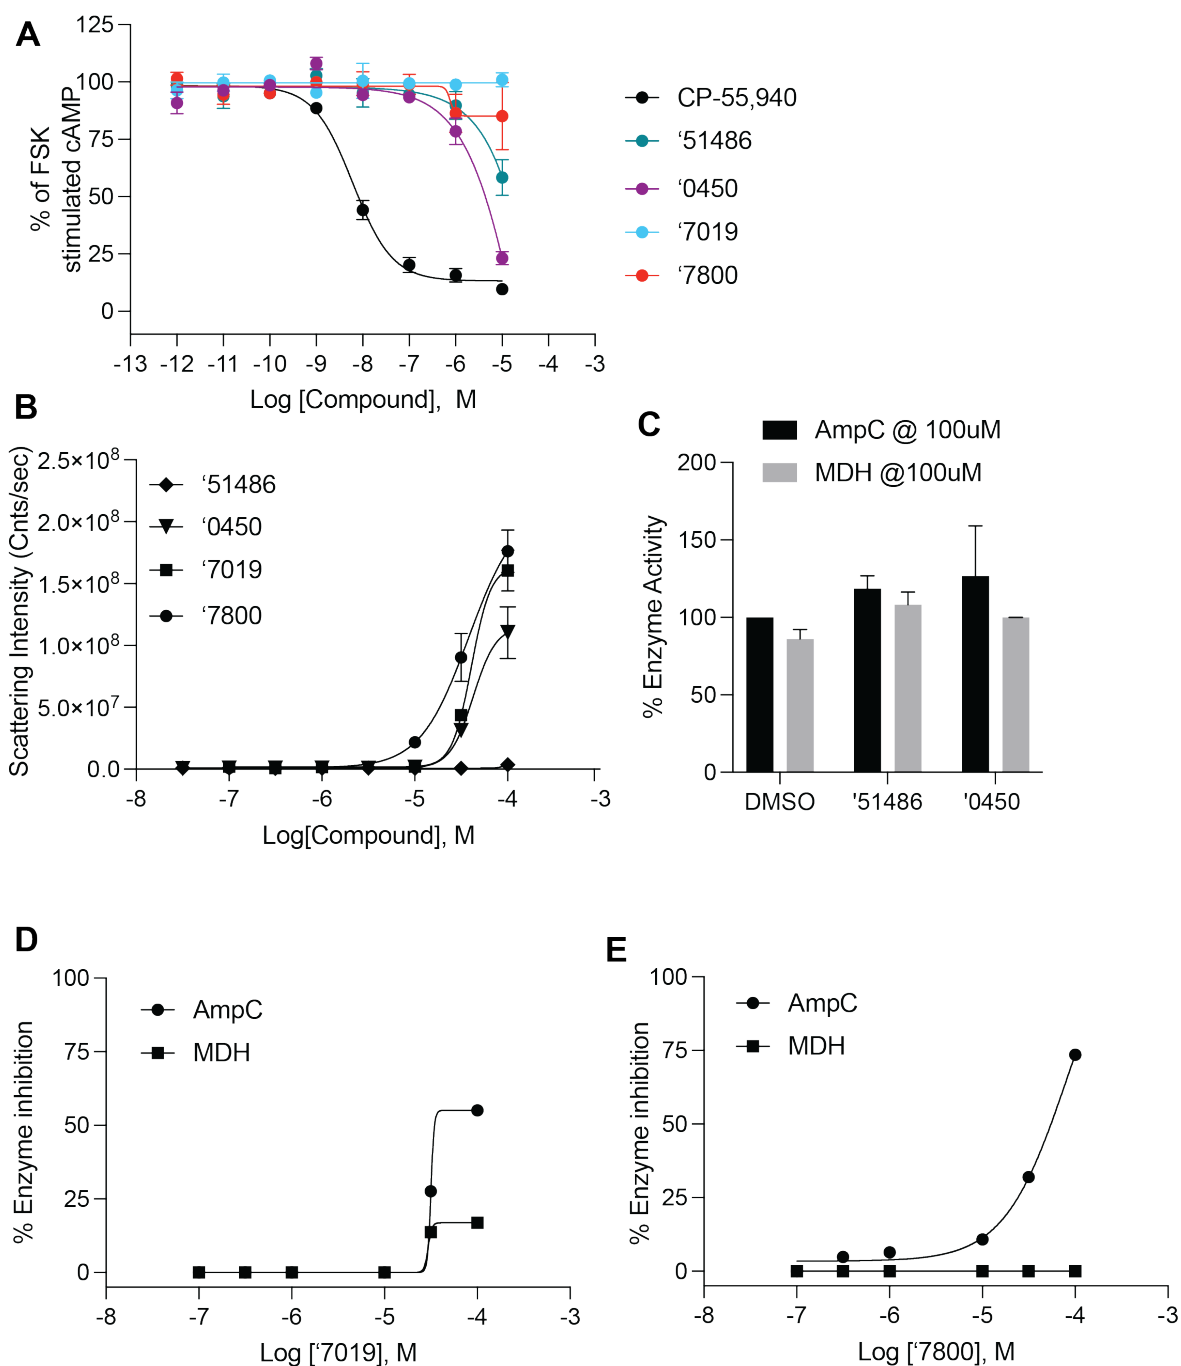

**Figure S2.** Functional measurements for a subset of screening hits. **A.** Functional cAMP inhibition at hCB1R by the four most potent docking hits. **B.** Scattering intensity in dynamic light scattering experiments of colloidal aggregation. **C.** Inhibition of the off-target enzymes MDH and AmpC Beta-lactamase at 100 uM. **D.** and **E.** Single-point inhibition of the off-target enzymes MDH and AmpC Beta-lactamase by '7019 (**D.**) and '7800 (**E.**). All data represent mean  $\pm$  SEM of three independent experiments in triplicate except **B.** which represents one independent experiment in triplicate.

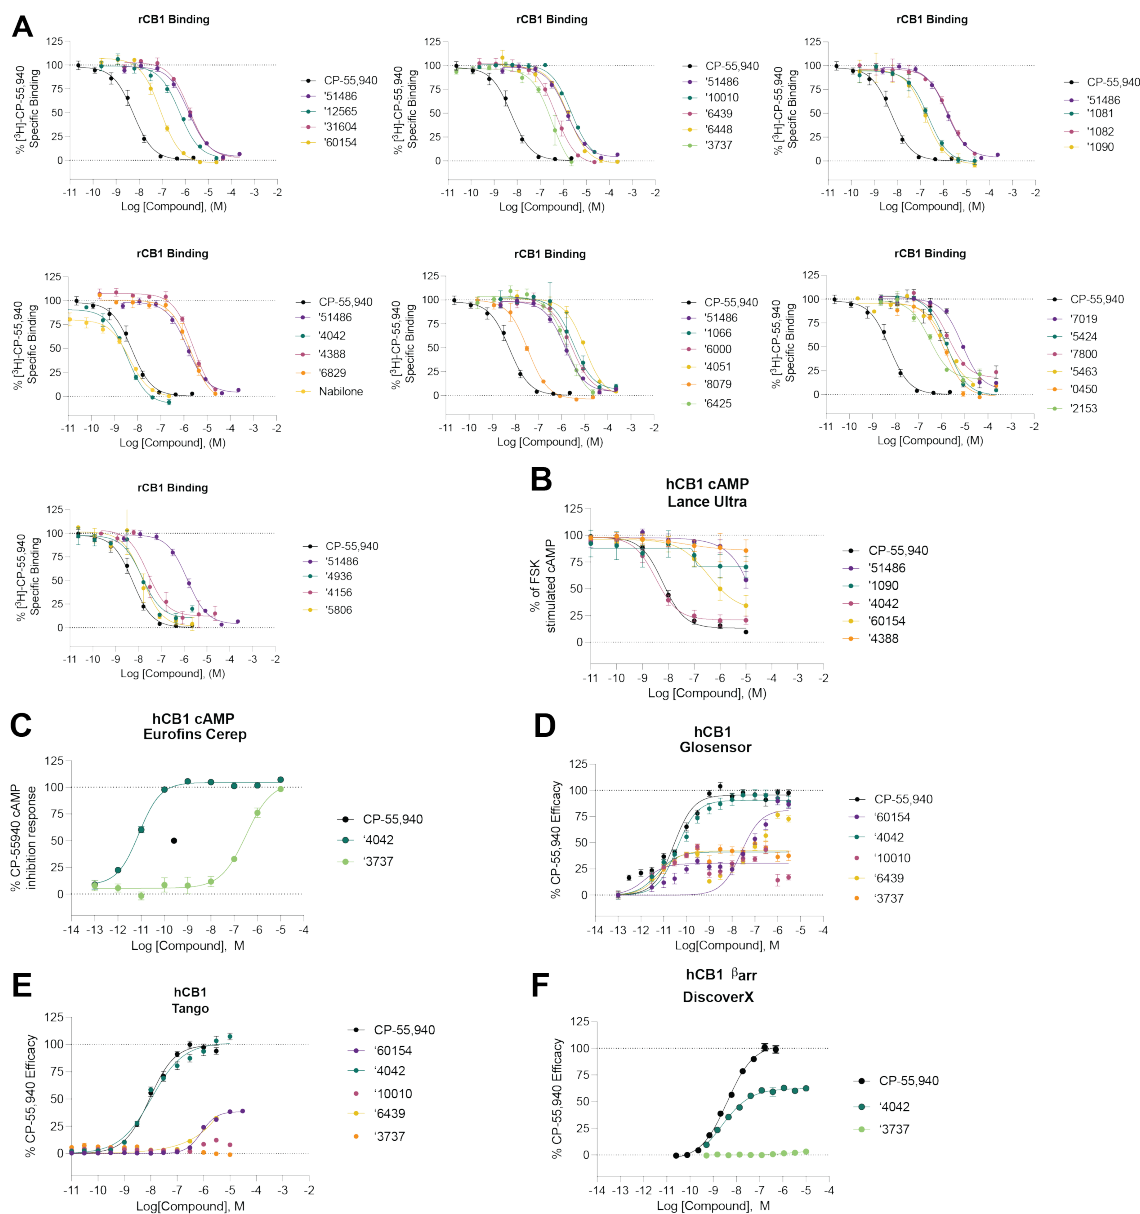

**Figure S3.** hCB1 binding and functional data for analogs. **A.** Competition binding data for primary hits and a subset of their analogs at hCB1. **B-D.** Functional cAMP inhibition for a subset of analogs at hCB1 across three separate assays. **E-F.** Functional  $\beta$ arr recruitment for a subset of analogs. All data represent mean  $\pm$  SEM of at least 2 independent experiments in triplicate except **C.** and **F.** which represent one independent experiment in triplicate. Best fit values can be found in **Supplementary Table 2.**

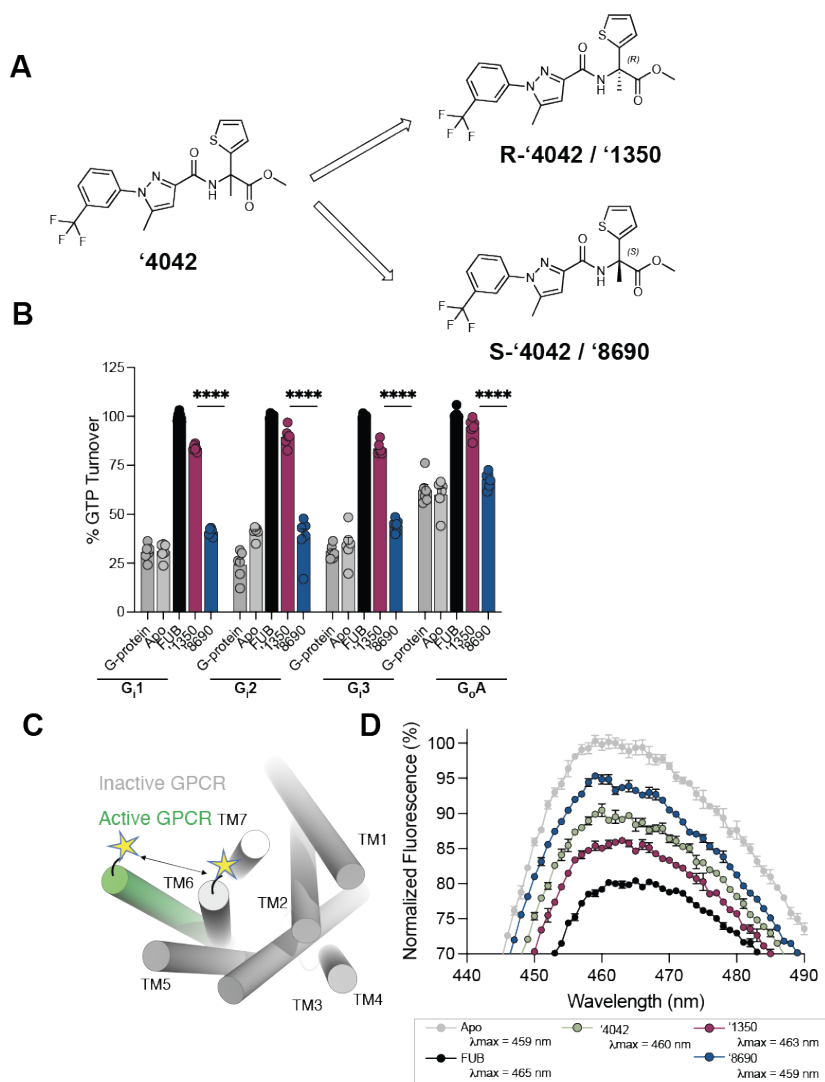

**Figure S4.** Additional pharmacological characterization of '4042 and its enantiomers. **A.** Chiral column purification led to the separation of two independent enantiomers, '1350 and '8690. '1350 was determined to be R-'4042 from the Cryo-EM structure. **B.** GTPase Glo assay characterizing GTP turnover of G-proteins G<sub>i1-3/o</sub>. **C.** Schematic of the environmentally sensitive fluorophore Monobromobimane (Bimane) which when site-specifically labeled (e.g. on TM6) acts as a conformational reporter. **D.** Compared to the apo (grey), the spectrum of full agonist MDMB-fubinaca (Fub)-bound CB1 (black) shows a decrease in intensity and a blue-shift in  $\lambda_{max}$  (Apo 459 nm to Fub 465 nm). The bimane spectrum of '8690 ( $\lambda_{max}$  459 nm, blue) is more similar to apo and the spectrum of '1350 ( $\lambda_{max}$  463 nm, magenta) is closer to that of Fub. The spectrum of the racemate, '4042 (green) is between '1350 (R-'4042) and '8690 (S-'4042). All data represent mean  $\pm$  SEM of three independent experiments in triplicate.

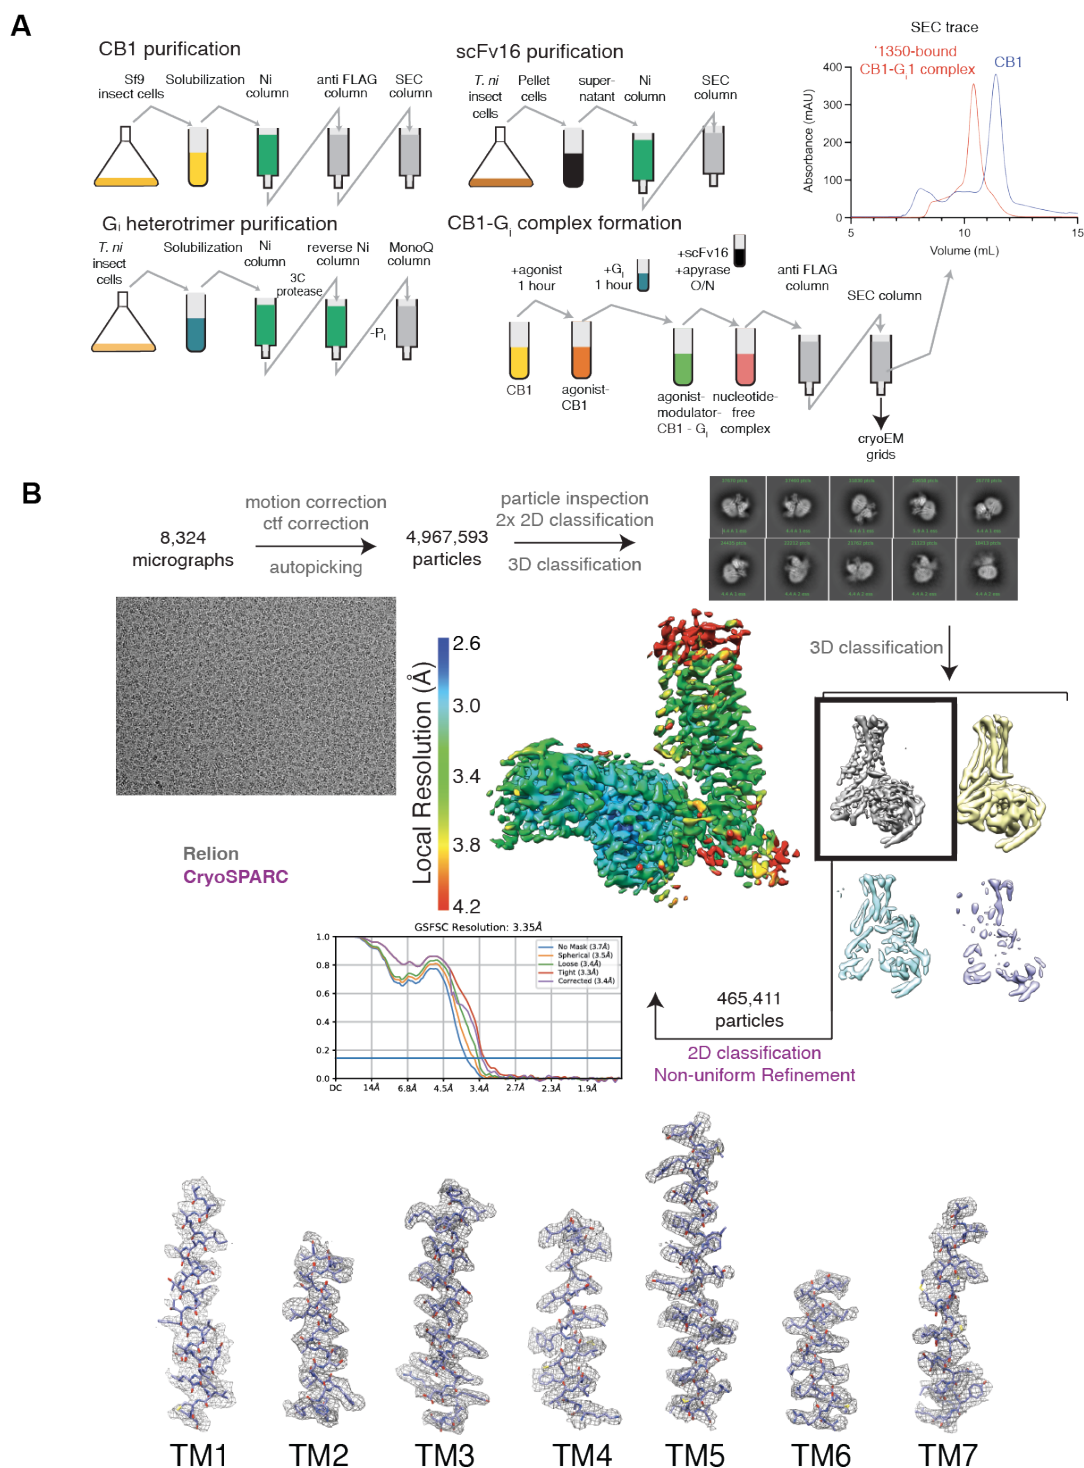

**Figure S5.** Cryo-EM sample preparation and data processing. **A.** Purification of hCB1, scFv16, the  $G_i$  heterotrimer, and complex formation protocols. **B.** Cryo-EM data processing flow chart of CB1, including particle selection, classifications, and density map reconstruction. Details can be found in **Supplementary Table 3**.

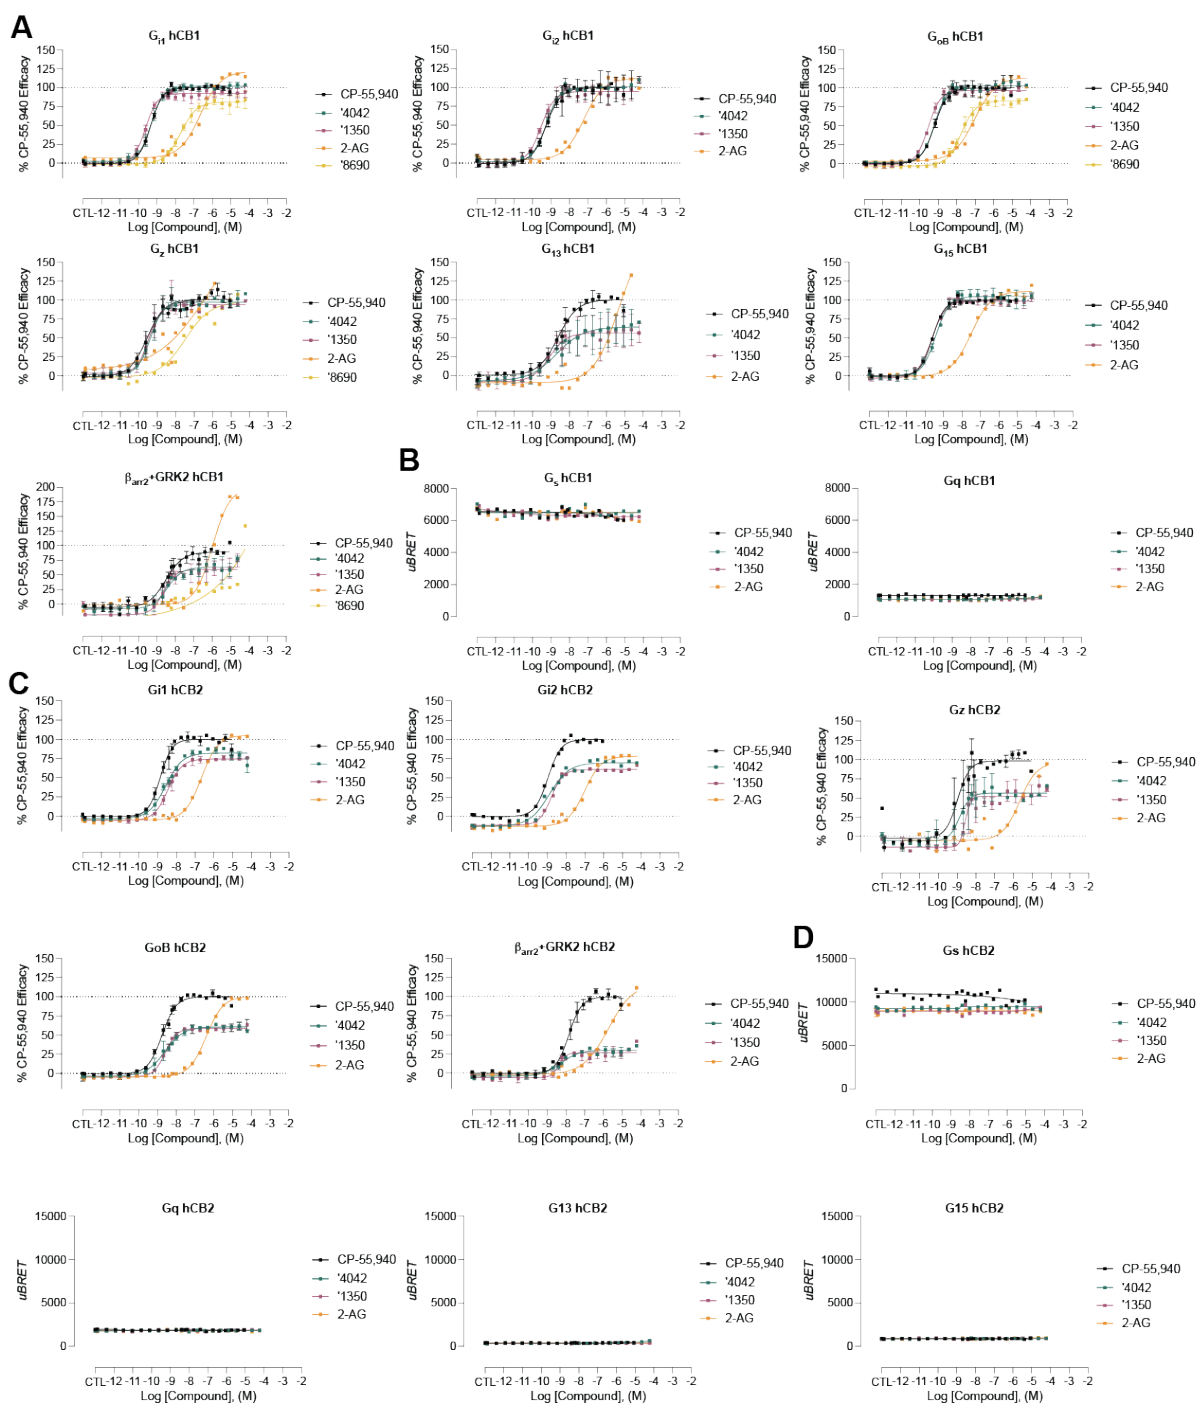

**Figure S6.** hCB1/2 functional data for select analogs in the bioSens-All® platform. **A.** Normalized activity for select analogs versus a panel of sensors in hCB1-expressing cells. **B.** Raw BRET activity for select analogs versus  $G_s$  and  $G_q$  in hCB1-expressing cells. **C.** Normalized activity for select analogs versus a panel of sensors in hCB2-expressing cells. **D.** Raw BRET activity for select analogs versus  $G_s$ ,  $G_q$ ,  $G_{12}$ , and  $G_{15}$  in hCB2-expressing cells. Best fit values can be found in **Supplementary Tables 5 & 8.**

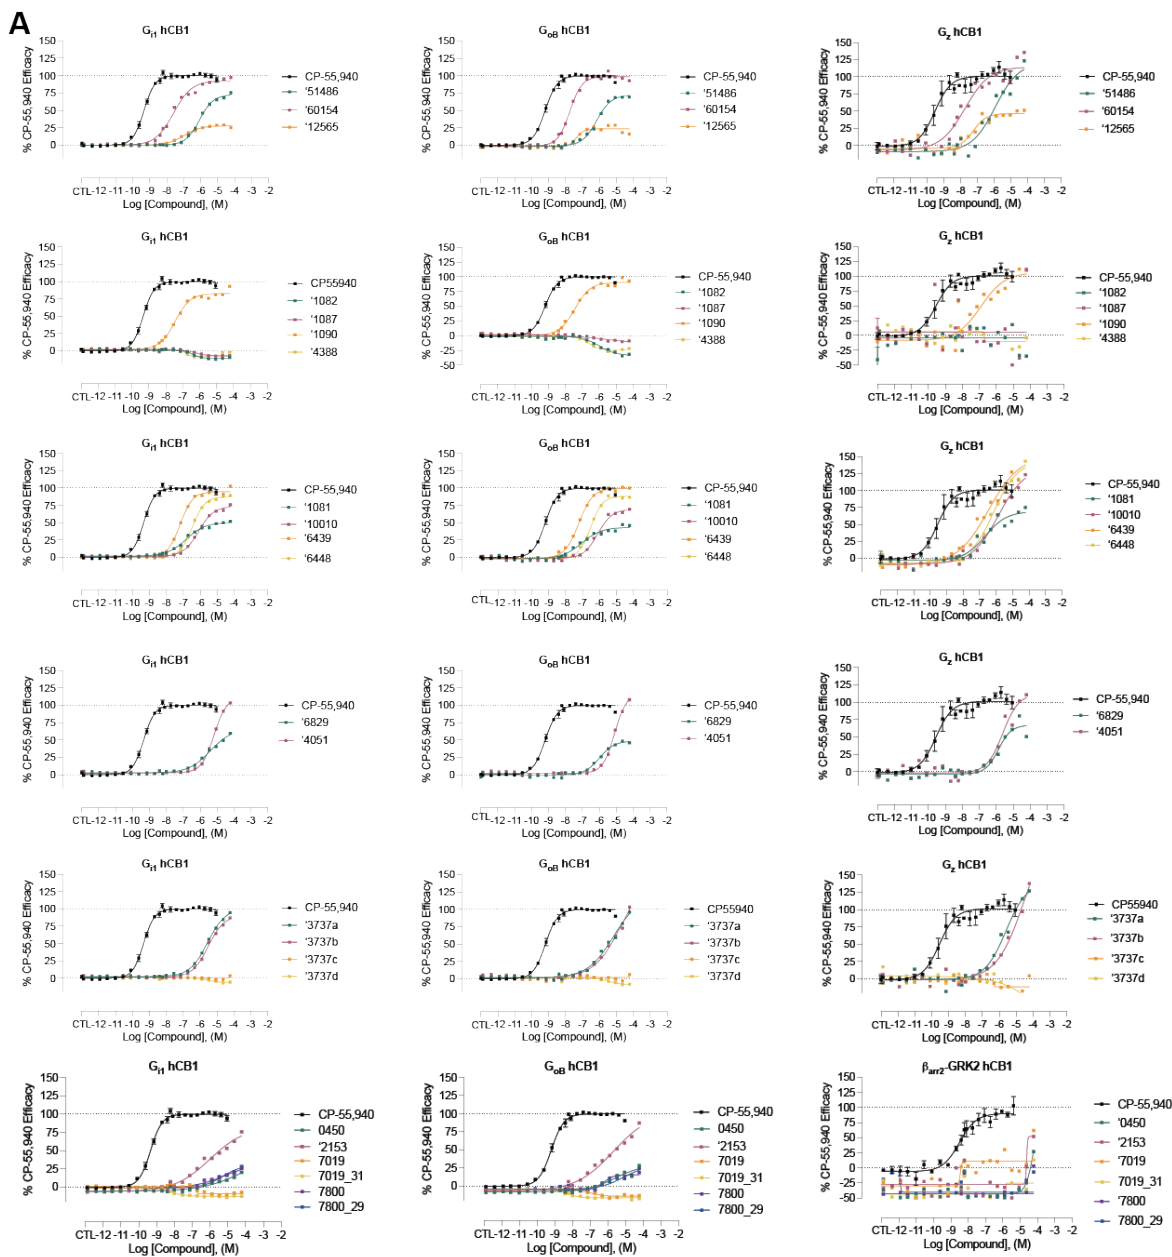

**Figure S7.** hCB1 functional data for select analogs in the bioSens-All<sup>®</sup> platform. **A.** Normalized activity for select analogs versus a panel of sensors in hCB1-expressing cells. Best fit values can be found in **Supplementary Table 4**.

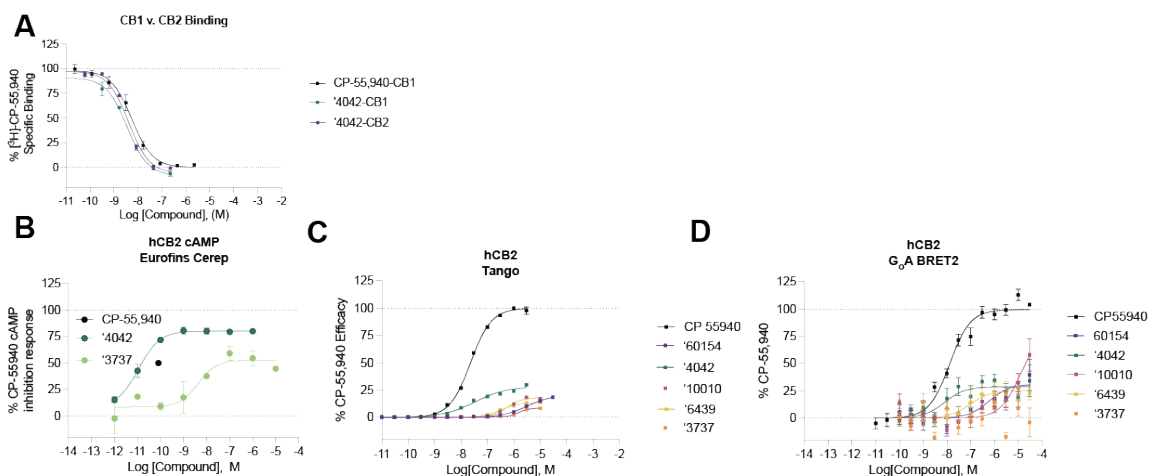

**Figure S8.** CB2R binding and functional data for select analogs. **A.** Competition binding data shows that '4042 is modestly more potent at CB1R than CB2R (rCB1 pKi = 8.7 (95% CI 8.60 – 8.86), hCB2 pKi = 8.6 (95% CI 8.55 – 8.77);  $t(4) = 6.5$ ,  $p = 0.003$ ). **B-D.** Functional cAMP inhibition for a subset of analogs at hCB2 across three separate assays. All data represent mean  $\pm$  SEM of three independent experiments in triplicate except **B.** which represents one independent experiment in triplicate. Best fit values can be found in **Supplementary Table 7.**



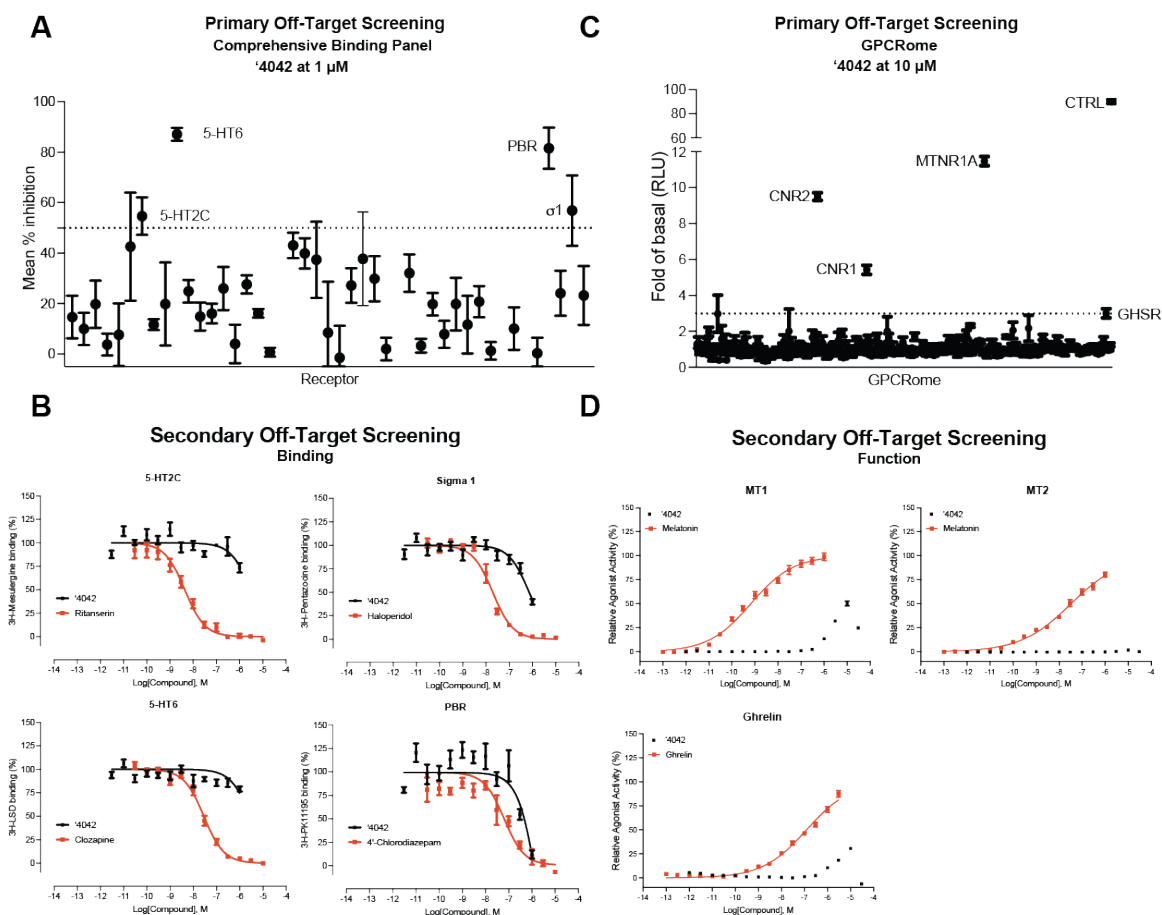

**Figure S9.** Off-target profiling of '4042. **A.** Comprehensive binding data against a panel of 45 common GPCR and non-GPCR drug targets. **B.** Follow-up dose response binding experiments for targets with > 50% inhibition in the single-point experiments. **C.** TANGO screens against a panel of 320 GPCRs for '4042. **D.** Follow-up dose response functional experiments for targets with > 3-fold activation in the single-point experiments. Data in **A.**, **C.**, and **D.** represent mean  $\pm$  SEM of 3 independent experiments in triplicate. Data in **B.** represent mean  $\pm$  SEM of 2 independent experiments in triplicate except 5-HT6 which is 3 independent experiments in triplicate.

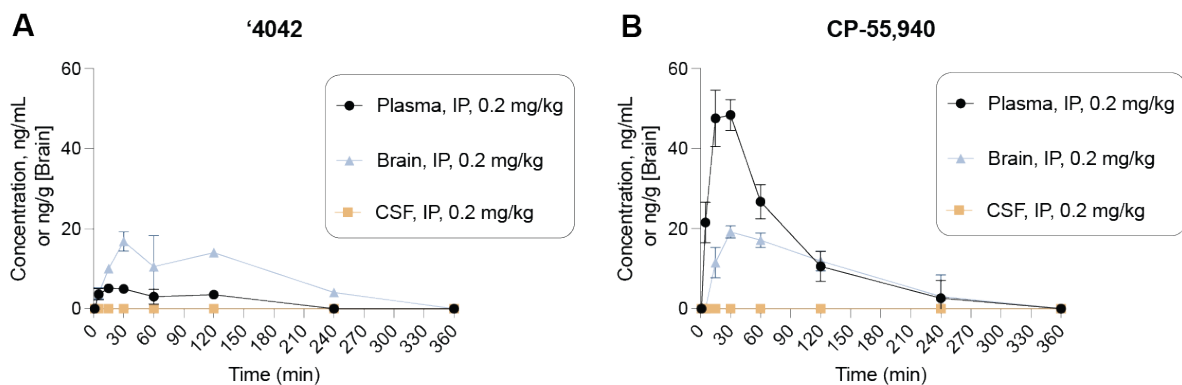

| Sample | Administration | Dose, mg/kg | '4042 Pharmacokinetic Parameters |                 |                                             |                                                |                                     |                                               |
|--------|----------------|-------------|----------------------------------|-----------------|---------------------------------------------|------------------------------------------------|-------------------------------------|-----------------------------------------------|
|        |                |             | Tmax, Min                        | Cmax, ng/ml (g) | AUC <sub>0-∞</sub> (AUClast), ng*min/ml (g) | AUC <sub>0-∞</sub> (AUCINF_obs), ng*min/ml (g) | T <sub>1/2</sub> (HL_Lambda_z), min | K <sub>el</sub> (Lambda_z), min <sup>-1</sup> |
| Plasma | IP             | 0.2         | 15.0                             | 5.14            | 446                                         | 1350                                           | 178                                 | 0.00388                                       |
| Brain  | IP             | 0.2         | 30.0                             | 16.8            | 2510                                        | 3180                                           | 114                                 | 0.00609                                       |
| CSF    | IP             | 0.2         | ND                               | BQL             | BQL                                         | ND                                             | ND                                  | ND                                            |

  

| Sample | Administration | Dose, mg/kg | CP-55,940 Pharmacokinetic Parameters |                 |                                             |                                                |                                     |                                               |
|--------|----------------|-------------|--------------------------------------|-----------------|---------------------------------------------|------------------------------------------------|-------------------------------------|-----------------------------------------------|
|        |                |             | Tmax, Min                            | Cmax, ng/ml (g) | AUC <sub>0-∞</sub> (AUClast), ng*min/ml (g) | AUC <sub>0-∞</sub> (AUCINF_obs), ng*min/ml (g) | T <sub>1/2</sub> (HL_Lambda_z), min | K <sub>el</sub> (Lambda_z), min <sup>-1</sup> |
| Plasma | IP             | 0.2         | 30.0                                 | 48.4            | 3360                                        | 3990                                           | 41.5                                | 0.0167                                        |
| Brain  |                |             | 30.0                                 | 19.2            | 1700                                        | 3880                                           | 127                                 | 0.098                                         |
| CSF    |                |             | ND                                   | BQL             | BQL                                         | ND                                             | ND                                  | ND                                            |

**Figure S10.** Pharmacokinetic profiles of '4042 compared to CP-55,940. Pharmacokinetic profile of '4042 (A.) and CP-55,940 (B.) after a single 0.2 mg/kg dose in brain, CSF, and plasma compartments. Data represent mean ± SEM of 3 animals per timepoint.

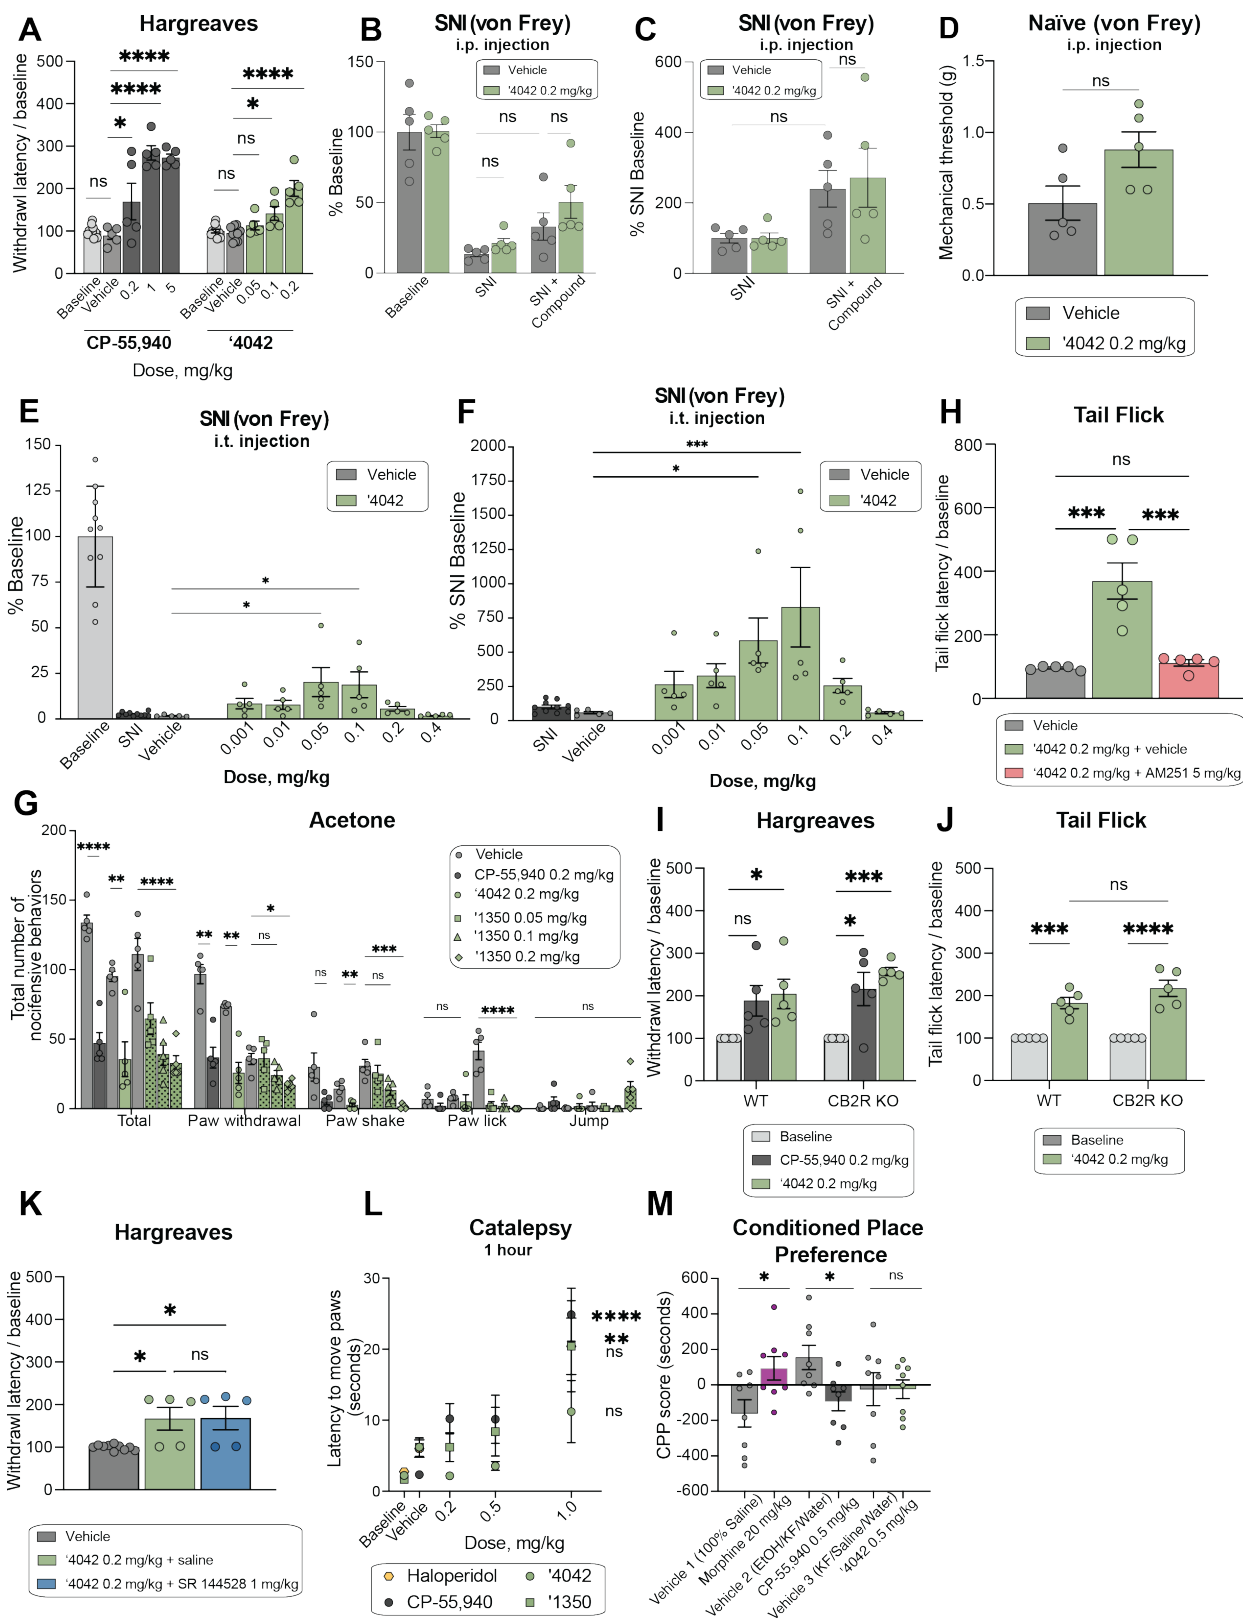

**Figure S11.** Additional analgesic and side-effect profiles of '4042 and '1350. **A.** Dose-response activity in the Hargreaves assay for '4042 ( $n = 5$ ; one-way ANOVA,  $F(3, 21) = 16.3$ ,  $P < 0.0001$ ) and CP-55,940 ( $n = 5$ ; one-way ANOVA,  $F(4, 25) = 26.2$ ,  $P < 0.0001$ ). Asterisks define individual group differences to respective vehicle control using Dunnett's multiple comparisons post-hoc test correction. **B.** Effect of '4042 (i.p.) in neuropathic pain model in mice after SNI with mechanical allodynia ( $n = 5$ ; two-way ANOVA; SNI x drug treatment interaction:  $F(2, 24) = 0.5$ ,  $P > 0.05$ ; SNI:  $F(2, 24) = 51.8$ ,  $P < 0.0001$ ; drug treatment:  $F(1, 24) = 1.6$ ,  $P > 0.05$ ; asterisks define individual group differences to vehicle control after Tukey's multiple comparisons post-hoc test correction). Data presented are normalized to pre-SNI baseline measurements. **C.** Effect of '4042 (i.p.) in neuropathic pain model in mice after SNI with mechanical allodynia ( $n = 5$ ; two-way ANOVA; SNI x drug treatment interaction:  $F(1, 16) = 0.1$ ,  $P > 0.05$ ; SNI:  $F(1, 16) = 9.6$ ,  $P = 0.007$ ; drug treatment:  $F(1, 16) = 0.1$ ,  $P > 0.05$ ; asterisks define individual group differences to vehicle control after Tukey's multiple comparisons post-hoc test correction). Data presented are normalized to post-SNI baseline measurements. **D.** Effect of '4042 (i.p.) in naïve (non-SNI) mice in the mechanical assay (all  $n = 5$ ; two-tailed unpaired  $t$ -test,  $t(8) = 2.17$ ,  $P > 0.05$ ). **E.** Effect of '4042 (i.t.) in neuropathic pain model in mice after SNI with mechanical allodynia ( $n = 5$ ; one-way ANOVA,  $F(6, 28) = 4.2$ ,  $P = 0.004$ ; asterisks define individual group differences to vehicle control after Dunnett's multiple comparisons post-hoc test correction). Data presented are normalized to pre-SNI baseline measurements. **F.** Effect of '4042 (i.t.) in neuropathic pain model in mice after SNI with mechanical allodynia ( $n = 5$ ; one-way ANOVA,  $F(7, 32) = 3.8$ ,  $P = 0.004$ ; asterisks define individual group differences to vehicle control after Dunnett's multiple comparisons post-hoc test correction). Data presented are normalized to post-SNI baseline measurements. **G.** Chemical hyperalgesia test after spared nerve injury (all  $n = 5$ ; '4042 vs. vehicle: multiple two-tailed unpaired  $t$ -tests, total:  $t(8) = 4.6$ ,  $P = 0.007$ ; paw withdrawal:  $t(8) = 6.2$ ,  $P = 0.001$ ; paw shake:  $t(8) = 4.5$ ,  $P = 0.007$ ; paw lick and jump:  $P > 0.05$ ; CP-55,940 vs. vehicle: multiple two-tailed unpaired  $t$ -tests, total:  $t(8) = 9.3$ ,  $P < 0.0001$ ; paw withdrawal:  $t(8) = 5.9$ ,  $P = 0.002$ ; paw shake, paw lick, and jump:  $P > 0.05$ , asterisks define differences to vehicle control after the Holm-Šidák multiple comparisons post-hoc test correction; '1350 vs. vehicle: two-way ANOVA; behavior x dose interaction:  $F(12, 80) = 8.2$ ,  $P < 0.0001$ ; behavior:  $F(4, 80) = 69.6$ ,  $P < 0.0001$ ; dose:  $F(3, 80) = 34.2$ ,  $P < 0.0001$ ; asterisks define individual group differences to vehicle control after Dunnett's multiple comparisons post-hoc test correction). **H.** Tail flick latency after co-treatment with the selective CB1 antagonist AM251 (all  $n = 5$ ; one-way ANOVA,  $F(2, 17) = 29.9$ ,  $P < 0.0001$ ; asterisks define individual group differences to baseline control after Tukey's multiple comparisons post-hoc test correction). **I.** Comparison of the effect of '4042 and CP-55,940 in wildtype (WT) versus CB2R knockout (KO) mice in the Hargreaves assay (all  $n = 5$ ; two-way ANOVA; genotype x drug treatment interaction:  $F(2, 24) = 0.5$ ,  $P > 0.05$ ; genotype:  $F(1, 24) = 1.6$ ,  $P > 0.05$ ; drug treatment:  $F(2, 24) = 13.8$ ,  $P = 0.0001$ ; asterisks define individual group differences to baseline after Tukey's multiple comparisons post-hoc test correction). **J.** Comparison of the effect of '4042 in wildtype (WT) versus CB2R knockout (KO) mice in the Tail Flick assay (all  $n = 5$ ; two-way ANOVA; genotype x drug treatment interaction:  $F(1, 16) = 2.2$ ,  $P > 0.05$ ; genotype:  $F(1, 16) = 2.2$ ,  $P > 0.05$ ; drug treatment:  $F(1, 16) = 72.3$ ,  $P < 0.0001$ ; asterisks define individual group differences to baseline after Šidák's multiple comparisons post-hoc test correction). **K.** Withdrawal latency in the Hargreaves assay after co-treatment with the selective CB2R antagonist SR 144528 (1 mg/kg) (all  $n = 5$ ; one-way ANOVA,  $F(2, 17) = 6.6$ ,  $P = 0.008$ ; asterisks define individual group differences to vehicle control after Tukey's multiple comparisons post-hoc test correction). **L.** Mesh grip test of catalepsy at 1 hour post-dose. Comparison of CP-55,940 ( $n = 5-10$ ; one-way ANOVA,  $F(3, 26) = 10.3$ ,  $P = 0.0001$ ), haloperidol ( $n = 5$ ; two-tailed unpaired  $t$ -test,  $t(8) = 3.5$ ,  $P = 0.009$ ), '4042 ( $n = 5$ ; one-way ANOVA,  $F(3, 16) = 3.0$ ,  $P > 0.05$ ) and '1350 ( $n = 5-10$ ; one-way ANOVA,  $F(3, 26) = 1.8$ ,  $P > 0.05$ ). Asterisks define differences between 1 mg/kg dose for each compound and respective vehicle control. Data at 30 min. timepoint are in **Fig. 6**. **M.** Comparison of morphine ( $n = 8$ ; two-tailed unpaired  $t$ -test,  $t(14) = 2.51$ ,  $P = 0.03$ ) to CP-55,940 ( $n = 8$ ; two-tailed unpaired  $t$ -test,  $t(14) = 2.9$ ,  $P = 0.01$ ) and '4042 ( $n = 8$ ; two-tailed unpaired  $t$ -test,  $t(14) = 0.005$ ,  $P > 0.05$ ) in the Conditioned Place Preference (CPP) test. For all statistical tests: ns, not significant, \* $P < 0.05$ , \*\* $P < 0.01$ , \*\*\* $P < 0.001$ , \*\*\*\* $P < 0.0001$ . All data represent mean  $\pm$  SEM of 5-10 animals.
